# Supplementary material
Source: PubMed Central journal article supplement (PMC10231486)
Supplement: kiad143_supplementary_data.pdf [file kiad143_supplementary_data.pdf]

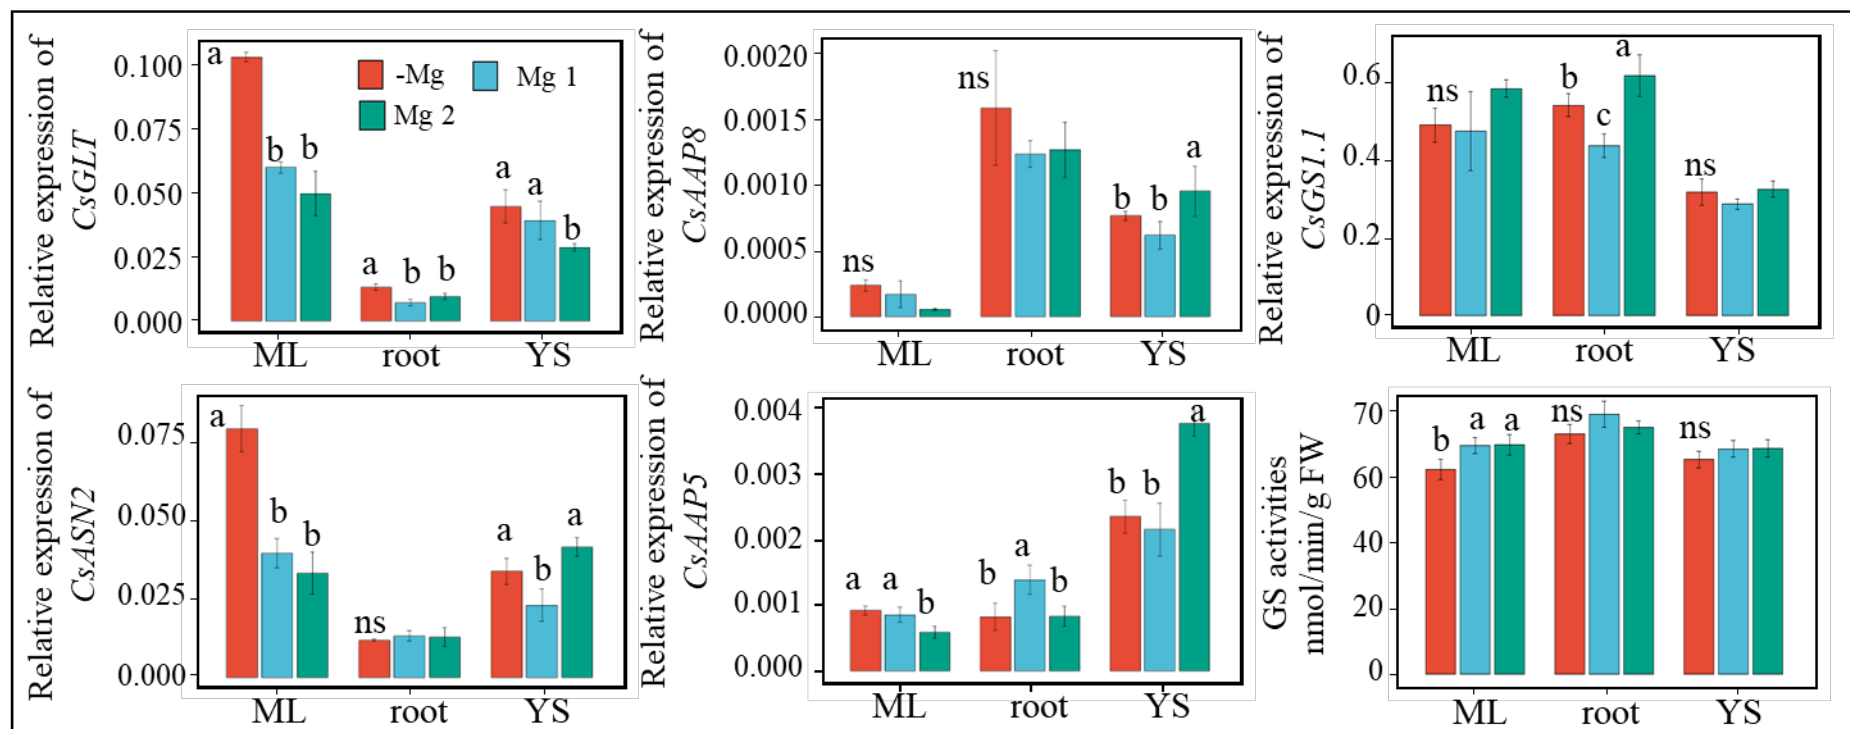

**Supplemental Figure S1. Relative expression levels of genes associated with N metabolism and enzyme activities of glutamine synthetase (GS) in mature leaf (ML), root, and young/new shoot (YS) of tea plants under different treatments. -Mg, Mg deficiency; Mg1, Mg concentration in the full-strength nutrient solution (0.4 mmol/L); Mg2, two times the Mg concentration in the full-strength nutrient solution. Error bars show the mean values  $\pm$  SD (n=3). Statistical analysis was carried out with Duncan's multiple range test. Different letters indicate significant differences (p < 0.05). FW, fresh weight; ns, not significant.**

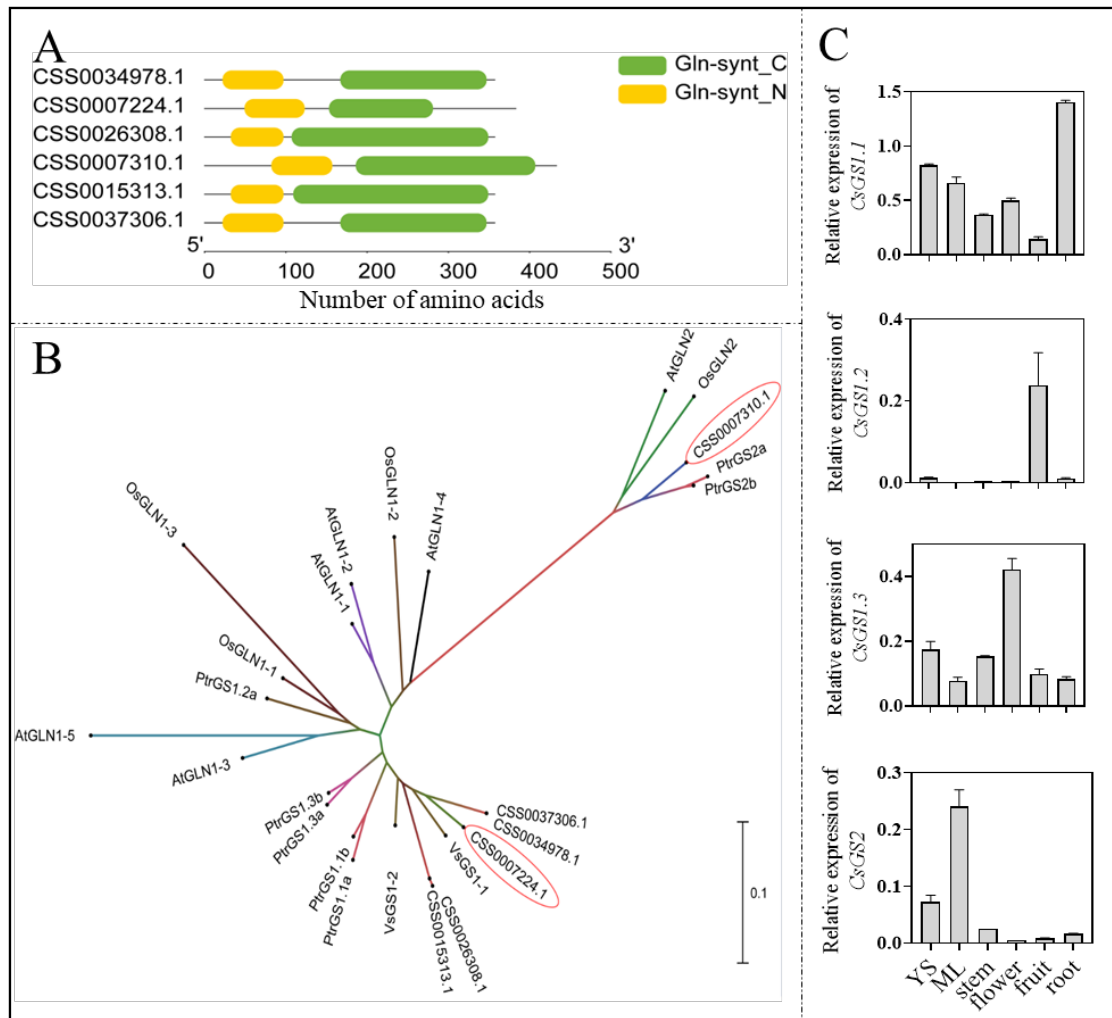

**Supplemental Figure S2. Identification of potential CsGS members.** (A) CsGS homologues in the tea plant genome. (B) Phylogenetic analysis of CsGS1s and GS1s from other plant species. Ptr, *Populus trichocarpa*; At, *Arabidopsis thaliana*; Vs, *Vitis vinifera*; Os, *Oryza sativa*. Protein ID used here were PtrGS1.1a (genome ID, Potri.004G085400.1), PtrGS1.2a (Potri.005G093200.1), PtrGS1.2b (Potri.007G069600.1), PtrGS2a (Potri.008G200100.14), PtrGS2b (Potri.010G029100.5), PtrGS1.3a (Potri.012G043900.1), PtrGS1.3b (Potri.015G034700.1), PtrGS1.1b (Potri.017G131100.1), AtGLN1-1 (uniprot ID, Q56WN1), AtGLN1-2 (Q43127), AtGLN1-3 (Q9LVI8), AtGLN1-4 (Q9FMD9), AtGLN1-5 (Q8GXW5), AtGLN2 (Q43127), VsGS1-1 (uniprot ID, P51118), VsGS1-2 (P51119), OsGLN1-1 (uniprot ID, P14656), OsGLN1-2 (P14654), OsGLN1-3 (Q4W8D0), and OsGLN2 (P14655). The scale bar indicates number of amino acid substitutions per site. (C) Relative expression levels of CsGSs in young shoot (YS), mature leaf (ML), stem, flower, fruit, and root of tea plant. Error bars show the mean values  $\pm$  SD (n =3).

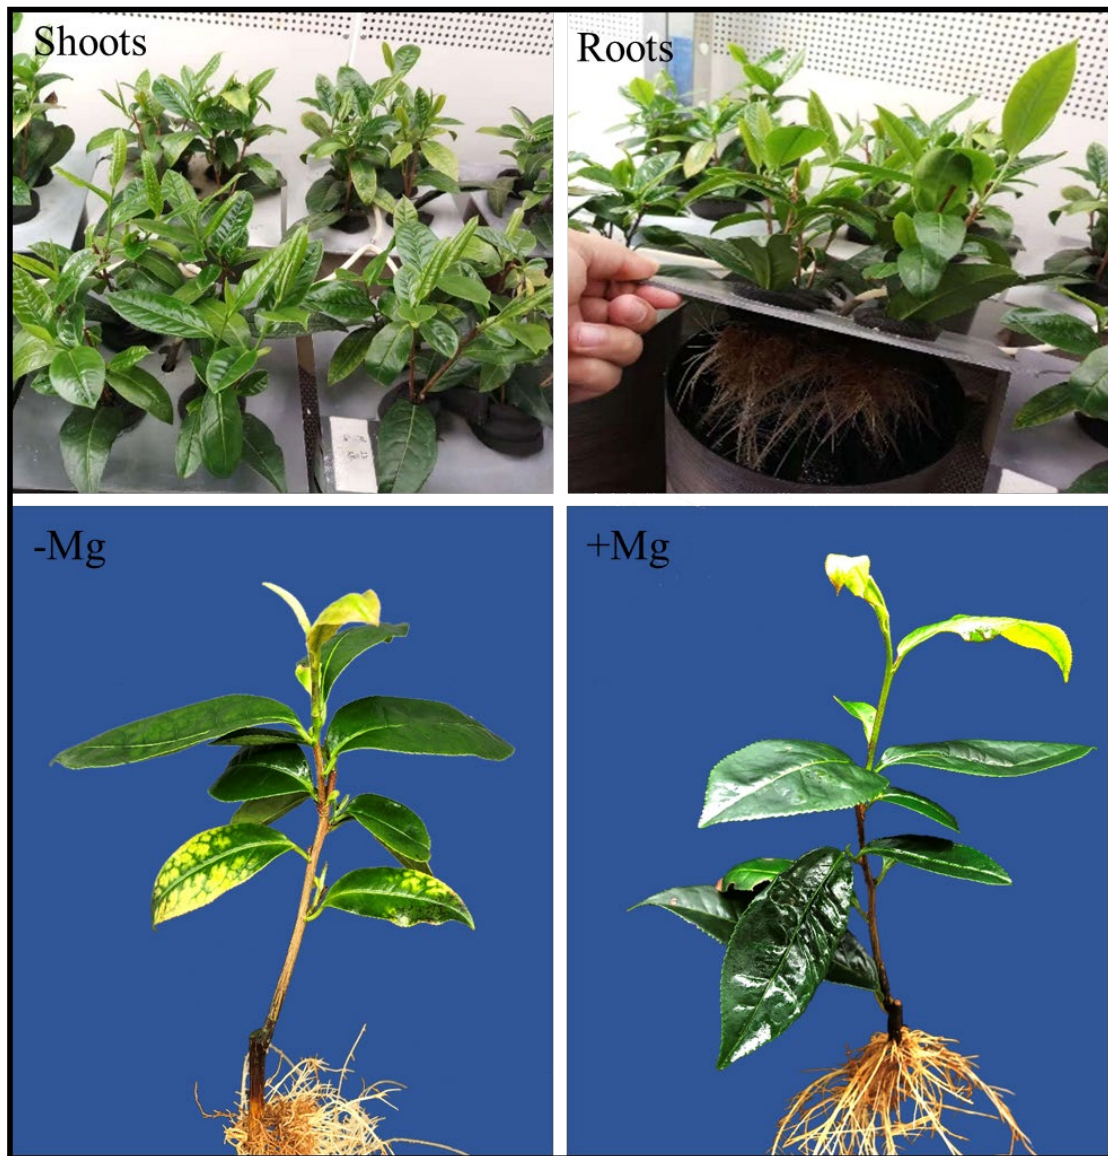

**Supplemental Figure S3. Phenotype of hydroponic tea plants under different Mg supply conditions.** The images in the bottom row were digitally extracted for comparison.

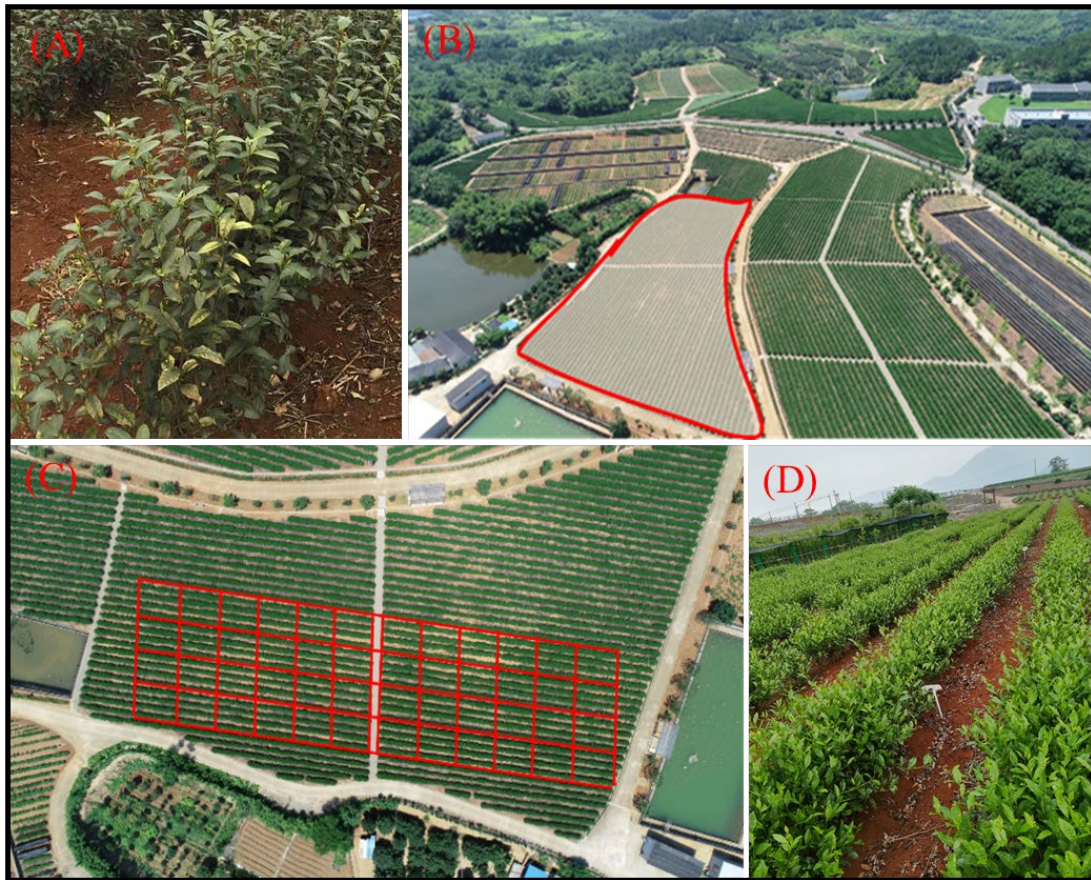

**Supplemental Figure S4. Field experiment investigating the interaction effect of Mg and N in tea production.** (A) Phenotype of tea plants under Mg deficiency treatment. (B) Tea plantation for experimental design. (C)-(D) Split-plot design in tea plantation located in Shengzhou, Zhejiang, China.

1 Supplemental Table S1. Putatively identified primary metabolites that showed significant changes in relative abundance in tea plants treated with Mg  
 2 deficiency (-Mg), Mg concentration in the full-strength nutrient solution (Mg1), and two times the Mg concentration in the full-strength nutrient solution  
 3 (Mg2).

|                            | Root               |         | Stem    |         | Shoot   |         | Leaf    |         |
|----------------------------|--------------------|---------|---------|---------|---------|---------|---------|---------|
|                            | Mg1/-Mg            | Mg2/Mg1 | Mg1/-Mg | Mg2/Mg1 | Mg1/-Mg | Mg2/Mg1 | Mg1/-Mg | Mg2/Mg1 |
| Asparagine                 | 0.52 <sup>a*</sup> | 1.30    | 1.16    | 1.30    | 0.77    | 1.56 *  | 0.72    | 1.59 *  |
| Arginine                   | 1.14               | 1.08    | 1.01    | 1.26    | 0.62    | 2.84    | 0.86    | 0.82    |
| Glutamine                  | 0.64 *             | 0.78 *  | 0.78    | 0.67 *  | 0.63 *  | 1.28 *  | 0.62 *  | 0.79    |
| Citrulline                 | 1.10               | 0.91    | 0.57    | 1.15    | 0.94    | 1.31    | 0.52 *  | 1.12 *  |
| Glutamic acid              | 0.82               | 0.74    | 1.30    | 0.64    | 0.92    | 0.80    | 0.79    | 0.99    |
| Glutathione (reduced)      | 0.99               | 0.47 *  | 0.81    | 0.44    | 0.82    | 1.13    | 0.78    | 1.14 *  |
| Phenylalanine              | 0.47 *             | 1.77 *  | 1.05    | 1.13    | 1.00    | 1.14 *  | 1.33    | 0.84    |
| Theanine                   | 0.79*              | 1.36*   | 1.17    | 0.65*   | 0.53*   | 1.28*   | 0.45*   | 0.79*   |
| Threonine                  | 1.31               | 1.48    | 0.91    | 1.21    | 0.33    | 3.61 *  | 0.99    | 0.85    |
| Tryptophan                 | 0.88               | 0.07 *  | 0.73    | 0.89    | -       | -       | 1.30    | 0.77    |
| γ-Glu-Leu                  | 0.76 *             | 0.92    | 0.69 *  | 2.08 *  | 1.08    | 1.54 *  | 14.52   | 0.50    |
| Citric acid                | 2.46 *             | 0.37 *  | 0.78    | 1.57    | 0.58    | 1.23    | 0.33    | 0.49    |
| Salicylic acid O-glucoside | 0.82               | 0.84    | 0.54 *  | 1.30    | 7.86 *  | 0.96    | 0.79    | 1.33    |
| Vitamin C                  | 0.83 *             | 1.02    | 1.00    | 1.19    | 1.10    | 0.68    | 0.94    | 0.76 *  |
| Fructose                   | 1.01               | 0.79 *  | 1.35    | 0.78    | 0.91    | 1.25 *  | 0.80    | 0.83    |
| Fucose                     | 0.89               | 1.07    | 1.03    | 1.09    | 1.76 *  | 1.17    | 1.45    | 0.50 *  |
| Glucose                    | 1.59 *             | 1.11    | -       | -       | 0.88    | 1.20    | -       | -       |
| Apigenin C-pentoside       | 2.12 *             | 1.37    | 0.61    | 1.02    | 1.30    | 1.34    | 0.11 *  | 3.90 *  |
| Kaempferol-glucoside       | 1.45               | 0.48    | -       | -       | 0.71    | 2.10    | 0.14 *  | 3.59 *  |
| Procyanidin A2             | 0.86               | 0.67 *  | 1.27    | 0.64 *  | 0.52 *  | 0.54    | 0.51    | 0.94    |
| Rutin                      | 5.52               | 0.10    | 0.59    | 1.24    | 1.25    | 1.27    | 0.13 *  | 3.90 *  |

4 <sup>a</sup> Fold change between different treatments, based on the peak intensity of the metabolite.

5 \* Significant difference ( $p < 0.01$ ), and VIP value  $> 1$  in partial least squares discriminant analysis (PLS-DA).

Supplemental Table S2. Identified candidate genes associated with N and amino acid metabolism that is affected by Mg nutrition with weighted gene co-expression network analysis.

| <b>Number</b> | <b>Gene ID</b> | <b>Annotation</b>                             | <b>Class_annotation</b>               |
|---------------|----------------|-----------------------------------------------|---------------------------------------|
| <b>i</b>      | CSS0050330     | Conserved region in glutamate synthase        | Amino acid transport and metabolism   |
| <b>ii</b>     | CSS0033052     | Transmembrane amino acid transporter protein  | Amino acid transport and metabolism   |
| <b>iii</b>    | CSS0014110     | Dof domain, zinc finger                       | --                                    |
| <b>iv</b>     | CSS0006318     | Glycosyl hydrolase family 14                  | --                                    |
| <b>v</b>      | CSS0001107     | Glycosyl transferase family 8                 | Carbohydrate transport and metabolism |
| <b>vi</b>     | CSS0029616     | Myb-like DNA-binding domain                   | Transcription                         |
| <b>vii</b>    | CSS0007224     | Glutamine synthetase, catalytic domain        | Amino acid transport and metabolism   |
| <b>viii</b>   | CSS0007310     | Glutamine synthetase, catalytic domain        | Amino acid transport and metabolism   |
| <b>ix</b>     | CSS0010308     | UDP-glucuronosyl and UDP-glucosyl transferase | --                                    |
| <b>x</b>      | CSS0019985     | UDP-glucuronosyl and UDP-glucosyl transferase | --                                    |
